# Supplementary figures and images for: Metabolic and Transcriptional Reprogramming in Developing Soybean (Glycine max) Embryos
Source: MDPI journal article supplement (doi:10.3390/metabo3020347), 2013-05-14

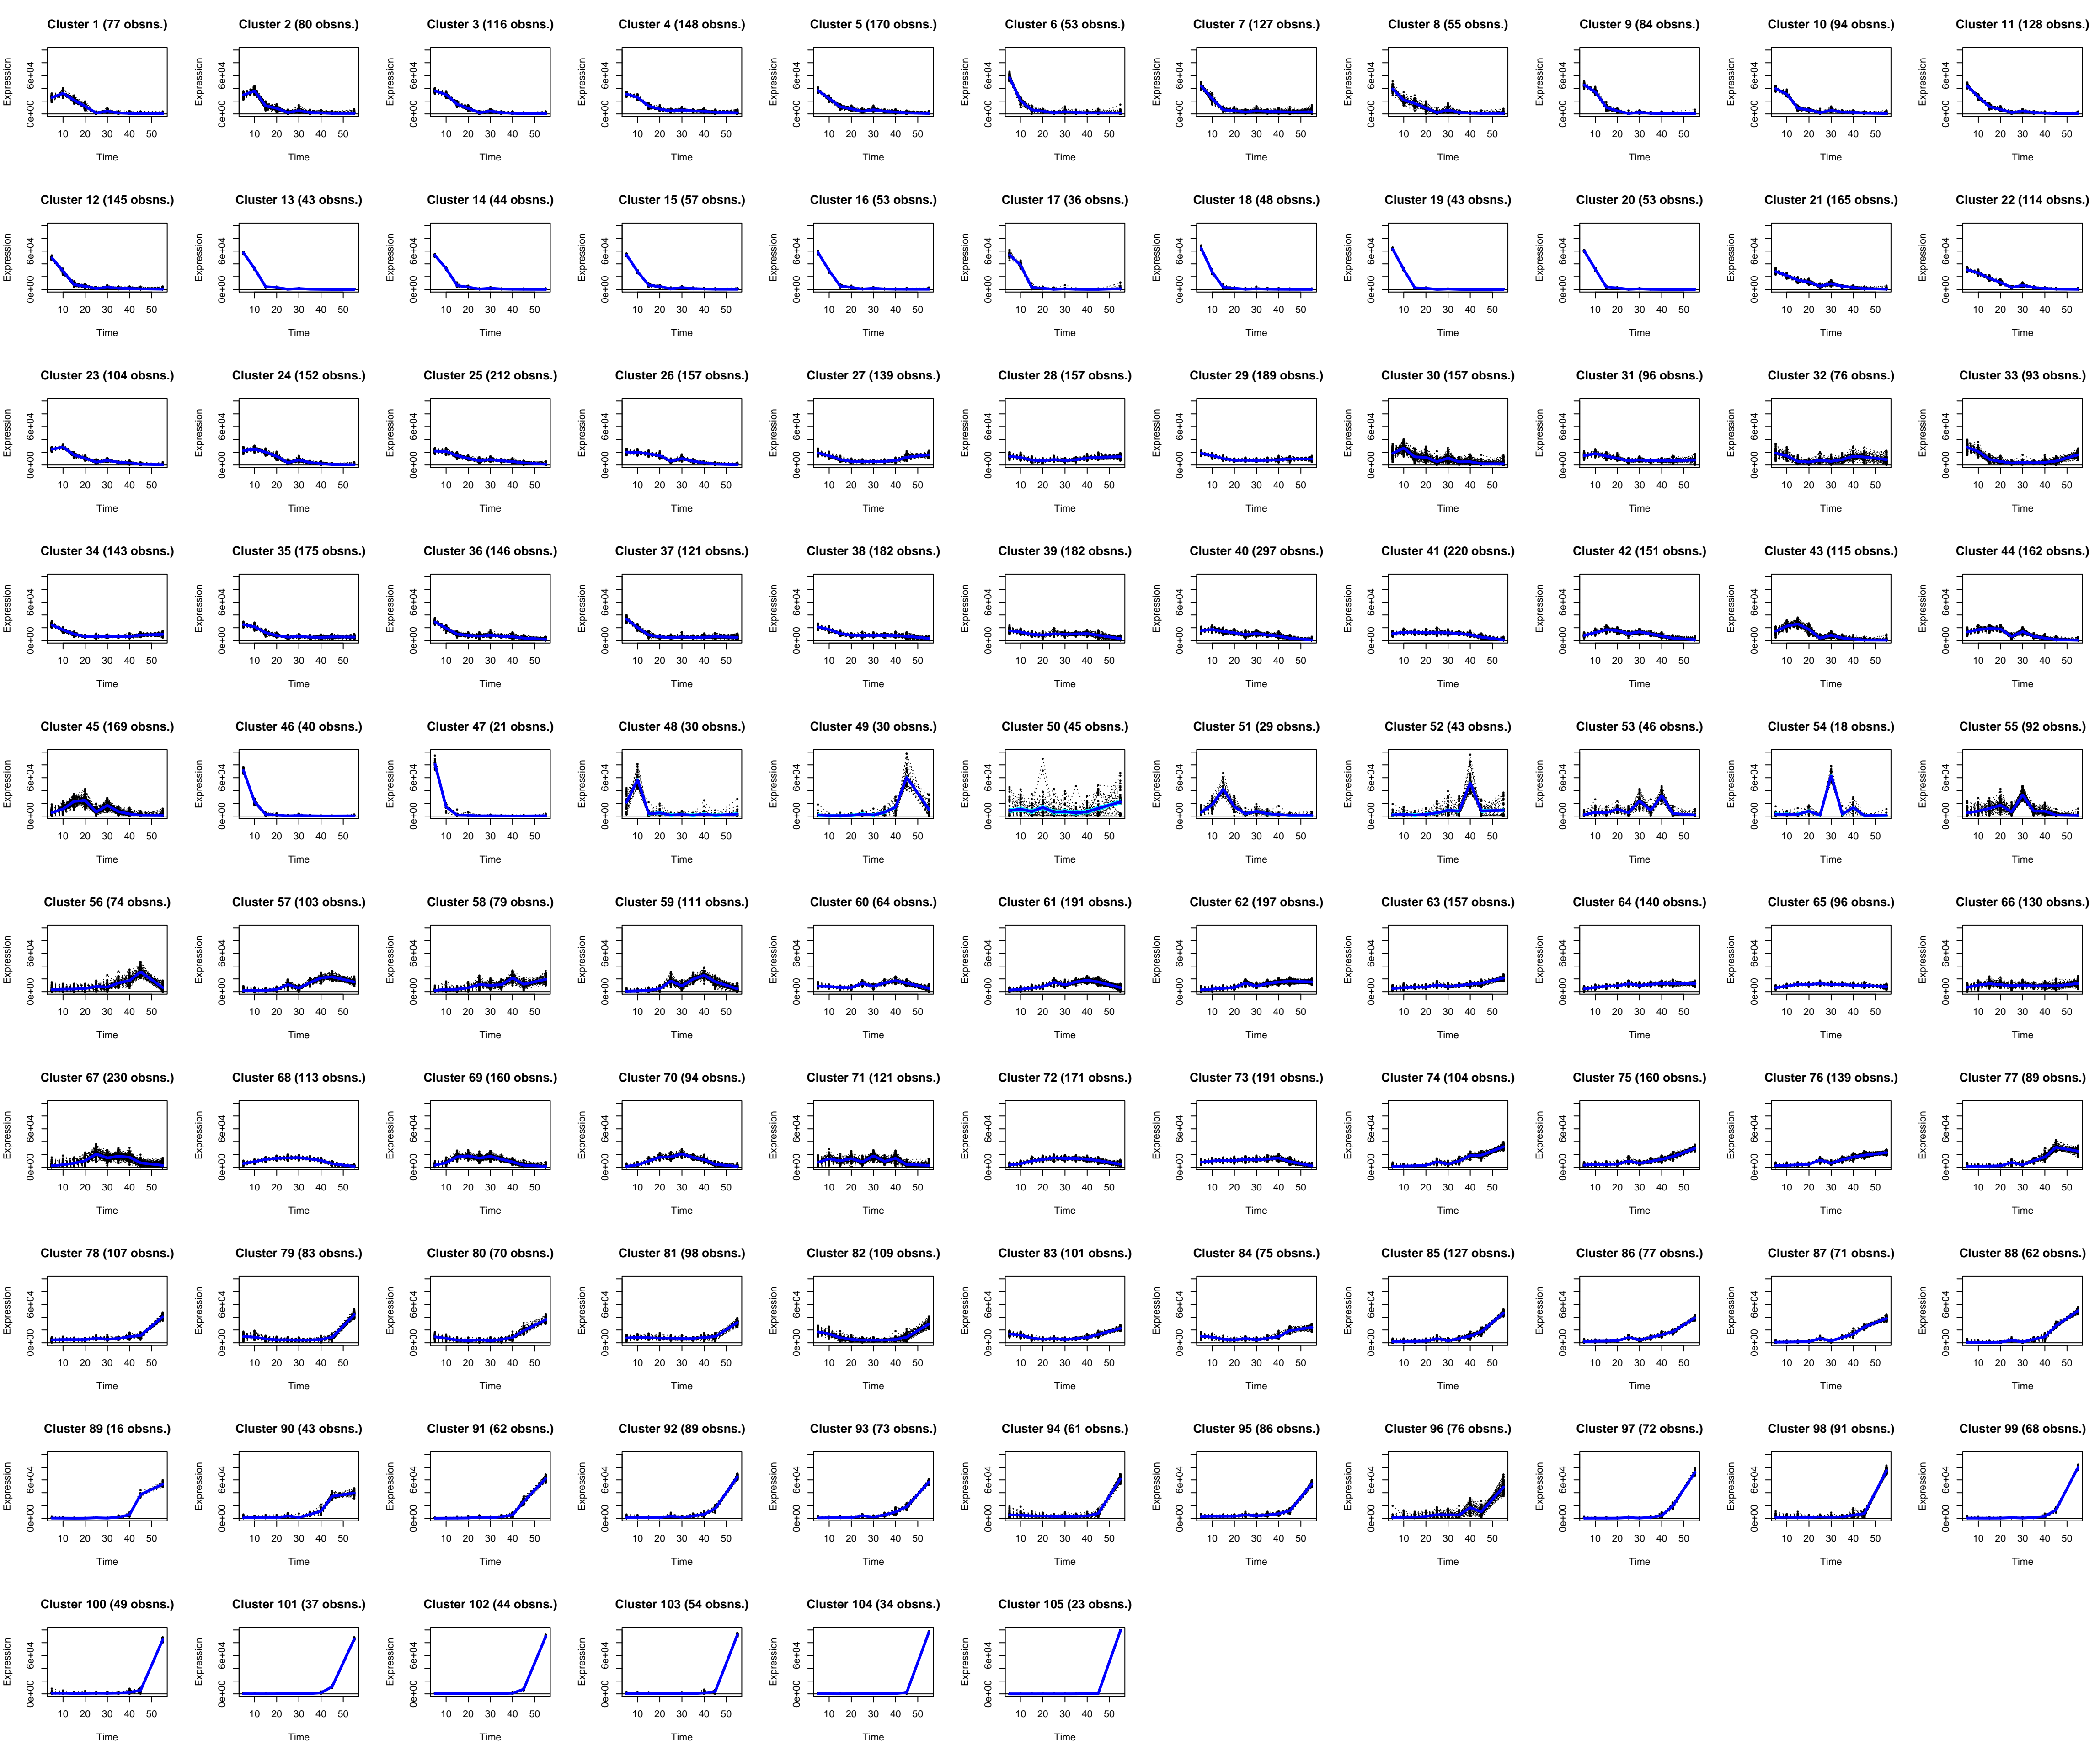

Supplement: s1 [file s1]
